Correction

# Correction: Give What You Get: Capuchin Monkeys (*Cebus apella*) and 4-Year-Old Children Pay Forward Positive and Negative Outcomes to Conspecifics

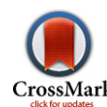

The PLOS ONE Staff

Figure 3 is incorrect. The authors have provided a corrected version here.

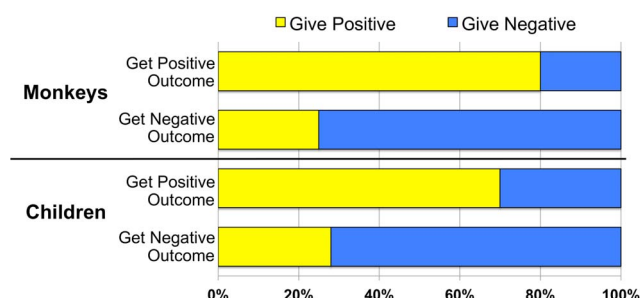

**Figure 3: Percentage of total trials in which monkeys and children paid forward positive and negative outcomes after receiving positive and negative outcomes.**

doi:10.1371/journal.pone.0087035.g003

## Reference

1. Leimgruber KL, Ward AF, Widness J, Norton MI, Olson KR, et al. (2014) Give What You Get: Capuchin Monkeys (*Cebus apella*) and 4-Year-Old Children Pay Forward Positive and Negative Outcomes to Conspecifics. PLoS ONE 9(1): e87035. doi:10.1371/journal.pone.0087035

**Citation:** The PLOS ONE Staff (2014) Correction: Give What You Get: Capuchin Monkeys (*Cebus apella*) and 4-Year-Old Children Pay Forward Positive and Negative Outcomes to Conspecifics. PLoS ONE 9(4): e96959. doi:10.1371/journal.pone.0096959

**Published:** April 29, 2014

**Copyright:** © 2014 The PLOS ONE Staff. This is an open-access article distributed under the terms of the Creative Commons Attribution License, which permits unrestricted use, distribution, and reproduction in any medium, provided the original author and source are credited.
